# Supplementary material for: Aquarium Viromes: Viromes of Human-Managed Aquatic Systems
Source: PubMed Central journal article supplement (PMC5492393; doi:10.3389/fmicb.2017.01231), 2017-06-30

**A****Cricket paralysis virus (NC003924)**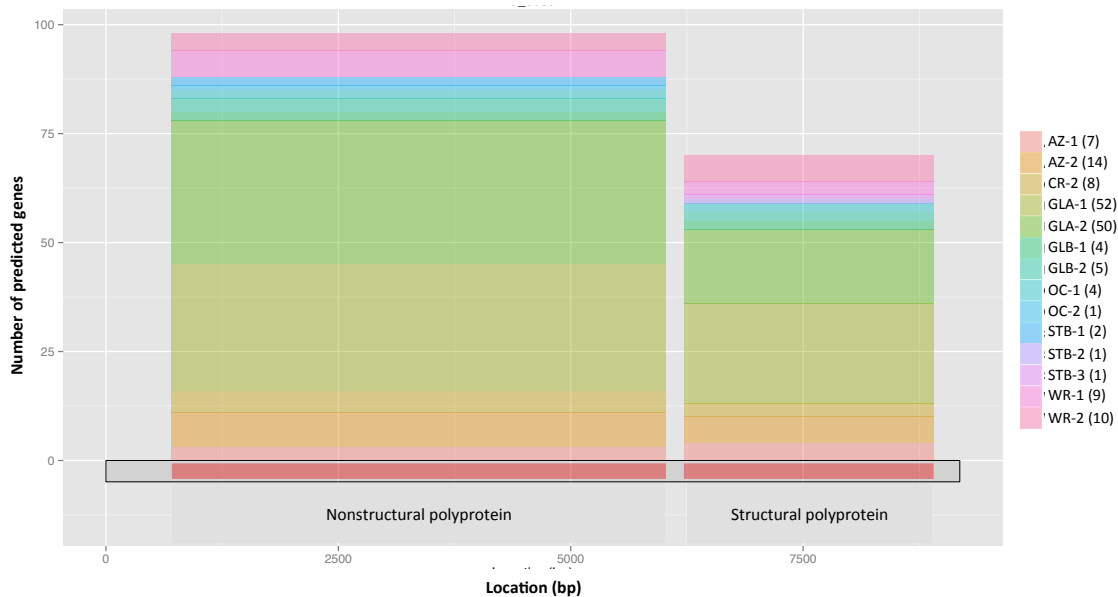**B****Drosophila C virus (NC001834)**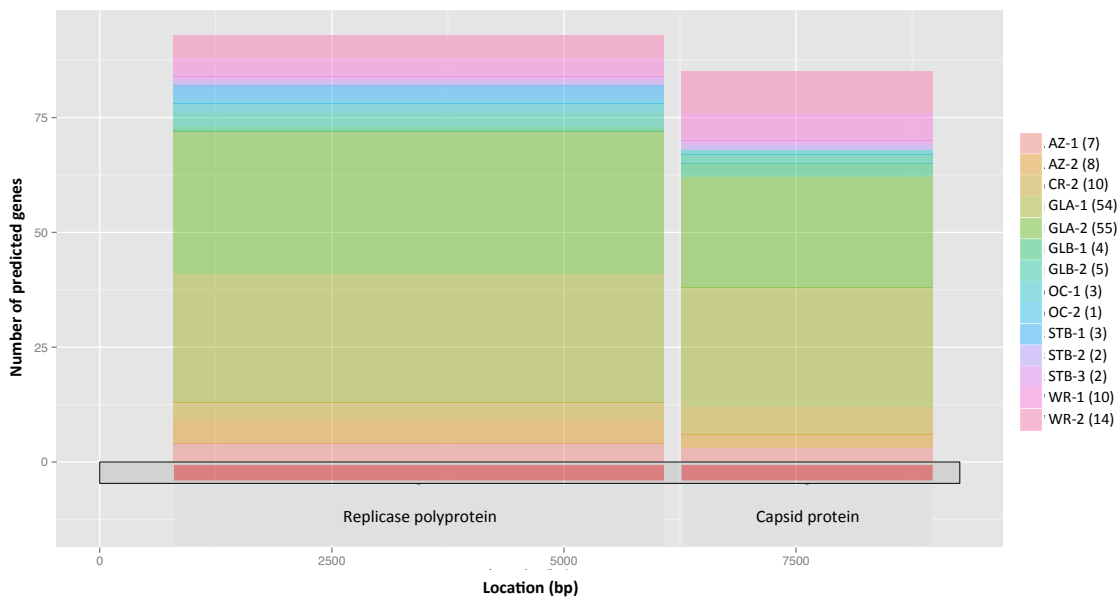

Supplement: Presentation_2.pdf [file Presentation_2.pdf]
